# Supplementary material for: Visible and near-infrared emitting heterotrimetallic lanthanide–aluminum–sodium 12-metallacrown-4 compounds: discrete monomers and dimers
Source: Royal Society of Chemistry journal article supplement (doi:10.1039/d1dt04277g), 2022-01-01
Supplement: d1dt04277g1.pdf [file d1dt04277g1.pdf]

## Electronic Supplementary Information for

### Visible and Near-infrared Emitting Heterotrimetallic Lanthanide-Aluminum-Sodium 12-Metallacrown-4 Compounds: Discrete Monomers and Dimers

Svetlana V. Eliseeva,<sup>a\*</sup> Jordan R. Travis,<sup>b</sup> Sarah G. Nagy,<sup>b</sup>  
Alyssa M. Smihosky,<sup>b</sup> Collin M. Foley,<sup>b</sup> Abigail C. Kauffman,<sup>b</sup>  
Curtis M. Zaleski,<sup>b\*</sup> and Stéphane Petoud<sup>a\*</sup>

---

<sup>a</sup>*Centre de Biophysique Moléculaire, CNRS UPR 4301, 45071  
Orléans Cedex 2, France.*

<sup>b</sup>*Department of Chemistry and Biochemistry, Shippensburg  
University, 1871 Old Main Dr., Shippensburg, PA 17257.*

\*corresponding email: svetlana.eliseeva@cnsr-orleans.fr,  
cmzaleski@ship.edu, and stephane.petoud@inserm.fr.

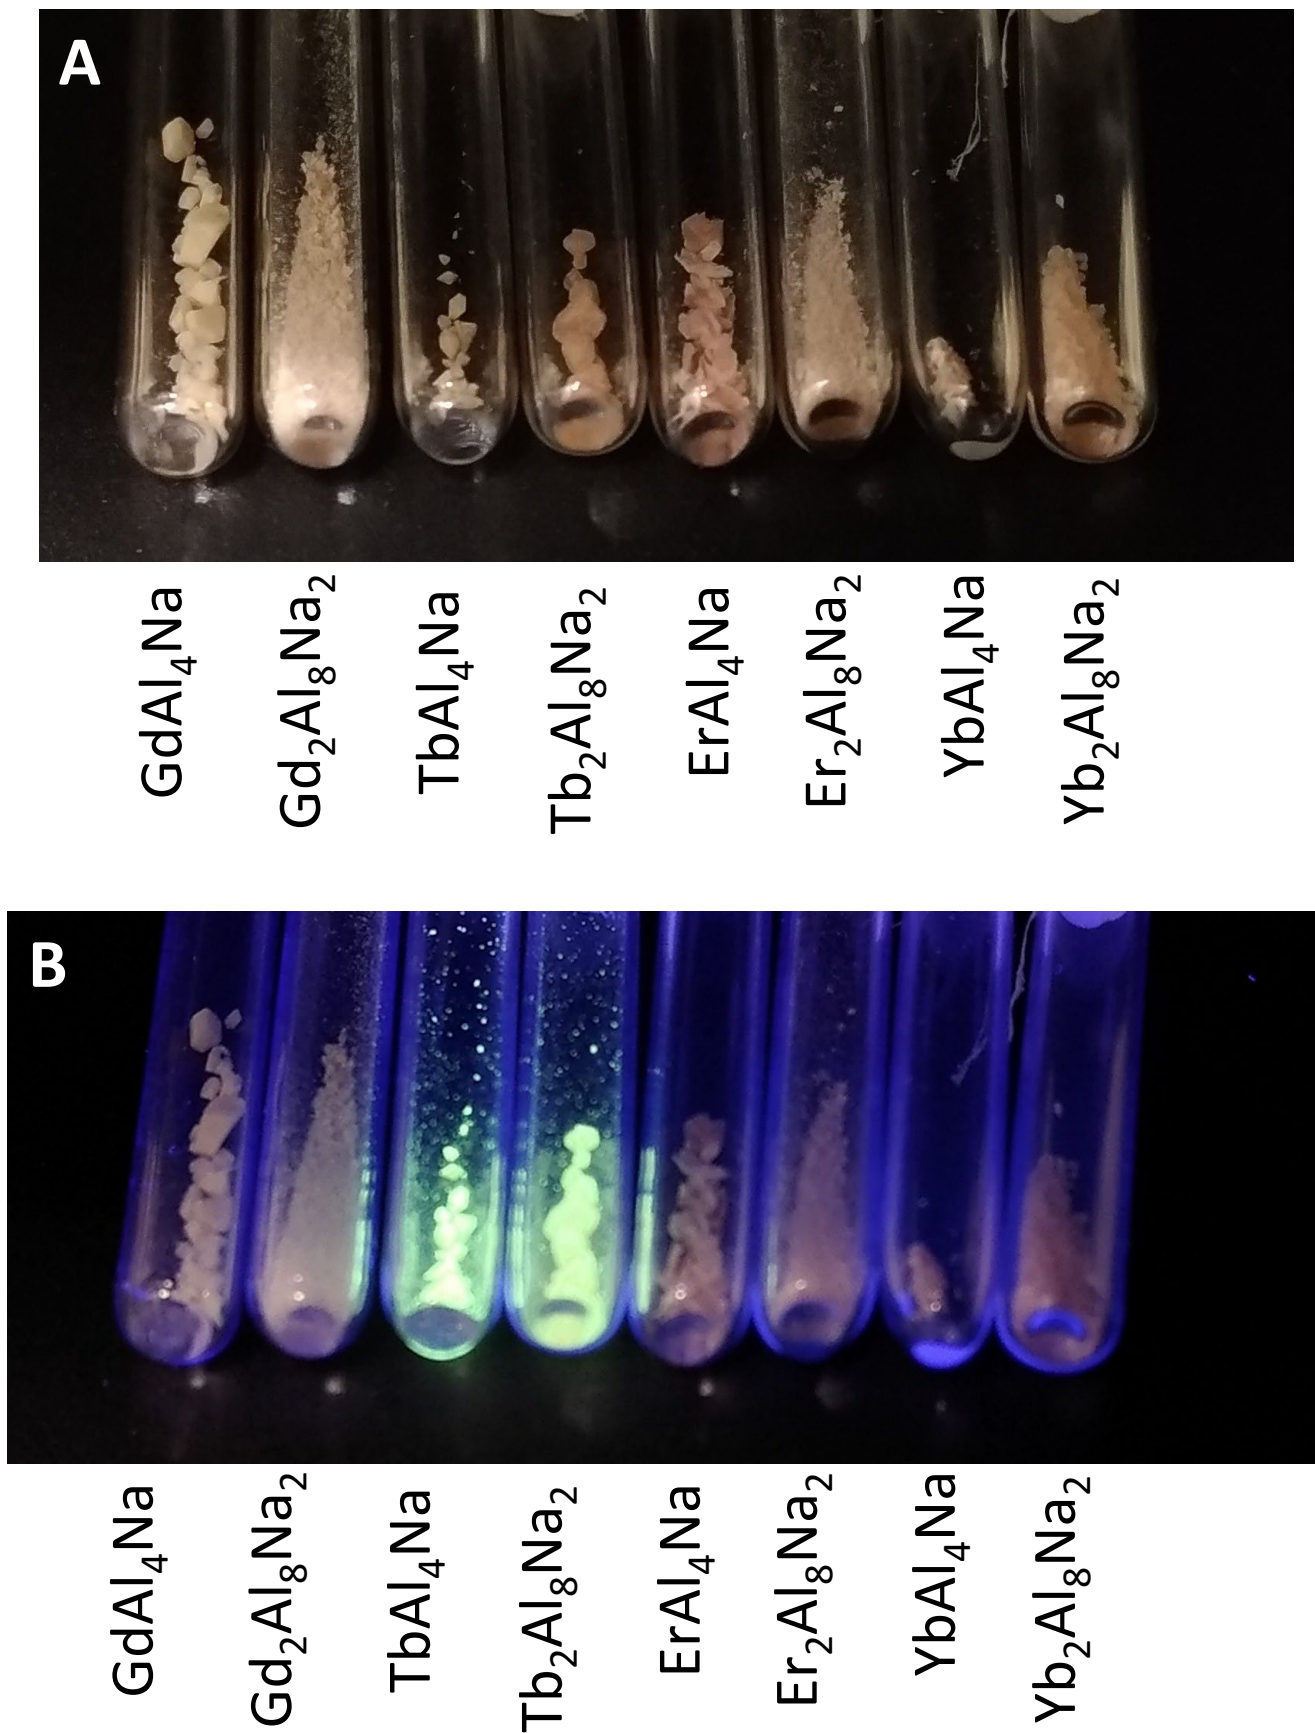

**Fig. S1.** Image of all investigated metallacrowns under (a) ambient conditions and (b) excitation at 254 nm. Only the terbium samples emit light in the visible spectrum and appear as the characteristic green color of terbium.

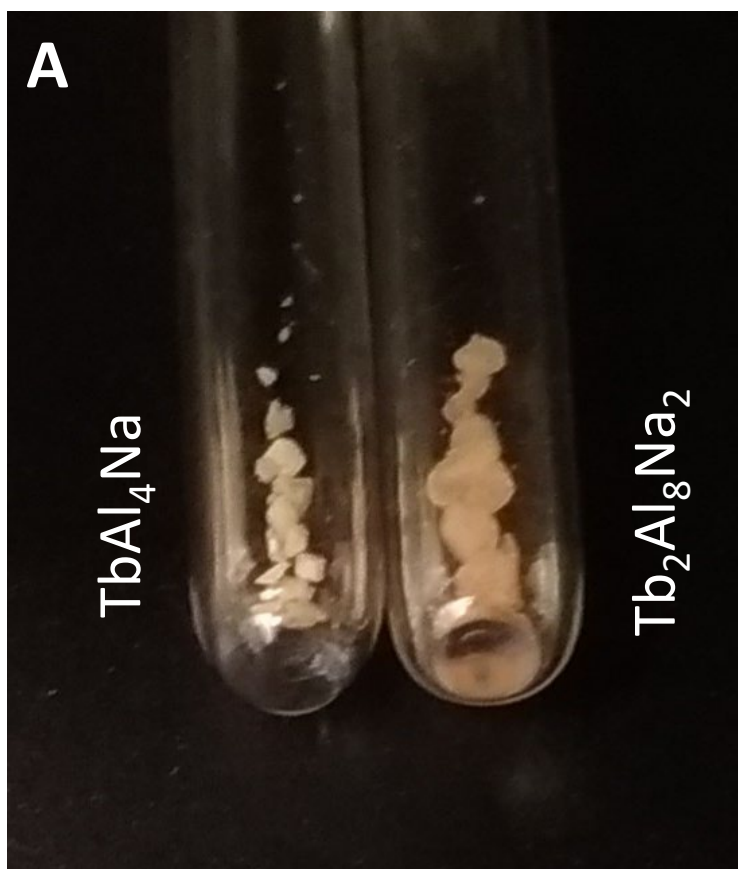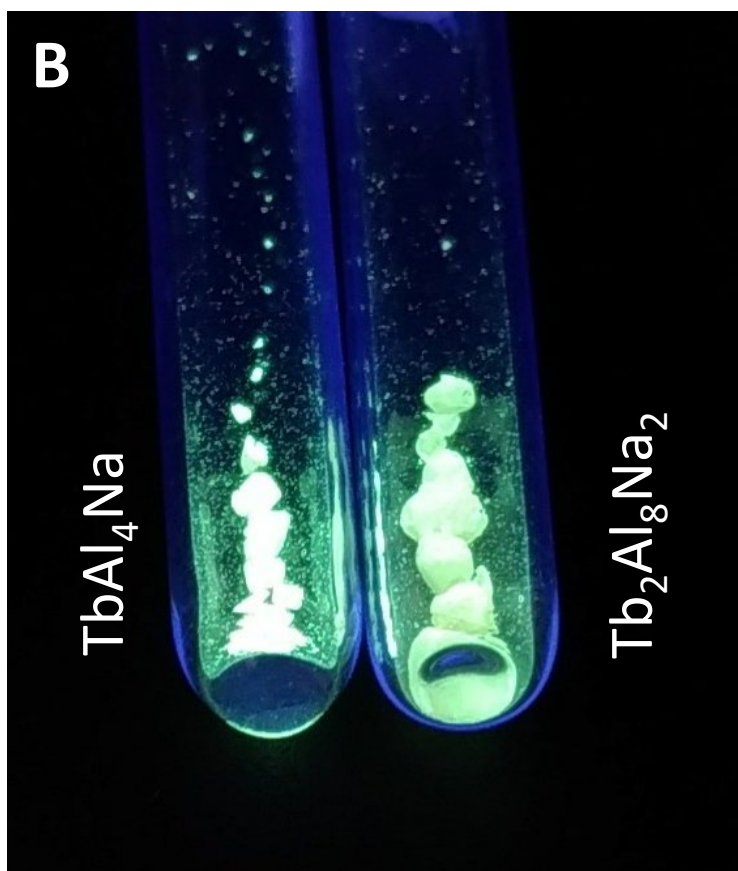

**Fig. S2.** Enlarged view of  $\text{TbAl}_4\text{Na}$  and  $\text{Tb}_2\text{Al}_8\text{Na}_2$  under (a) ambient conditions and (b) excitation at 254 nm. The terbium metallacrowns emit green light.
